# Supplementary material
Source: PubMed Central journal article supplement (PMC5629969)
Supplement: NIHMS873190-supplement-1.pdf [file NIHMS873190-supplement-1.pdf]

## Supplemental Text:

# Computational modeling for cardiac safety pharmacology analysis: Contribution of fibroblasts

Xin Gao, Tyler Engel, Brian E. Carlson, and Tetsuro Wakatsuki

Nebivolol can inhibit  $I_{Kr}$ ,  $I_{Ks}$ ,  $I_{Na}$ , and  $I_{to}$  channels within the range of concentration (0 to 100  $\mu\text{M}$ ) used in the simulations (Figure S1). Simulation results show that the AP of cardiomyocyte is significantly prolonged by increasing the concentration of nebivolol. The resting potential increases to about -20 mV and EAD occurs if the concentration increases to 100  $\mu\text{M}$  (Figure S2A). Coupling the cardiomyocyte with fibroblasts can markedly shorten the prolonged action potential (Figures S2B and S2C).

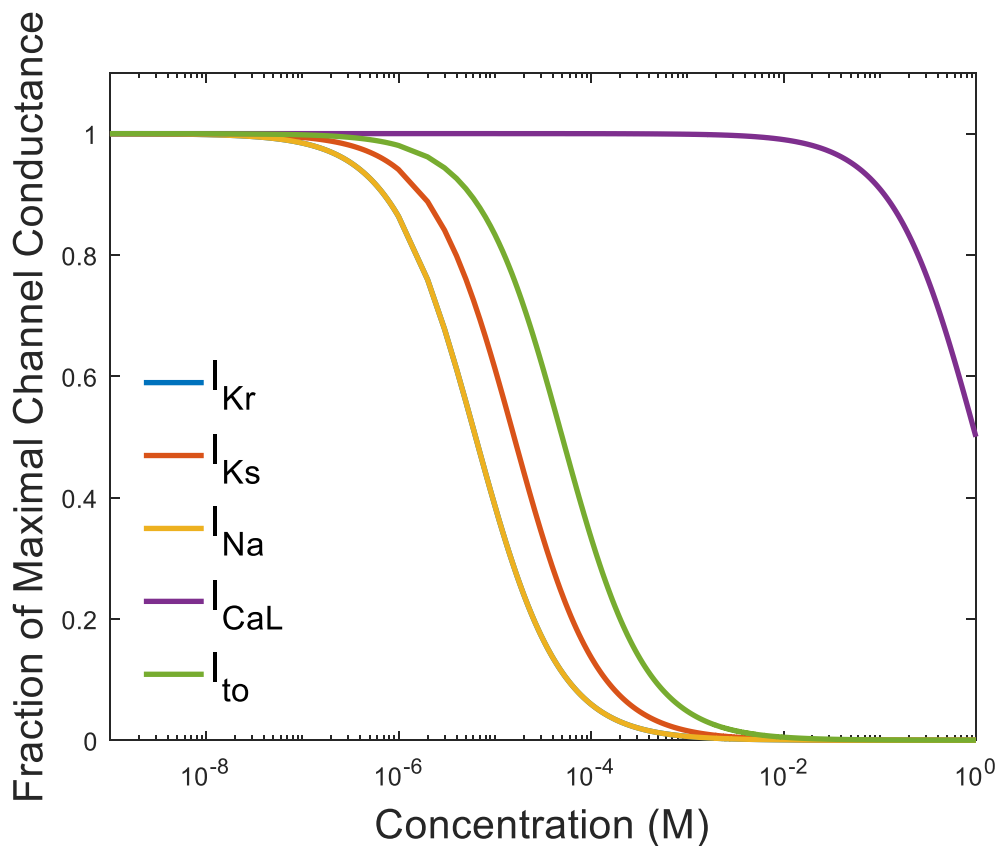

**Figure S1.** Effects of varying concentration of nebivolol on maximal conductance of five ion channels of the cardiomyocyte. For the range of nebivolol concentration used in the simulations (0 to 100  $\mu\text{M}$ ), nebivolol can block  $I_{Kr}$ ,  $I_{Ks}$ ,  $I_{Na}$ , and  $I_{to}$  channels. Note that the  $I_{Kr}$  curve is same as  $I_{Na}$  curve.

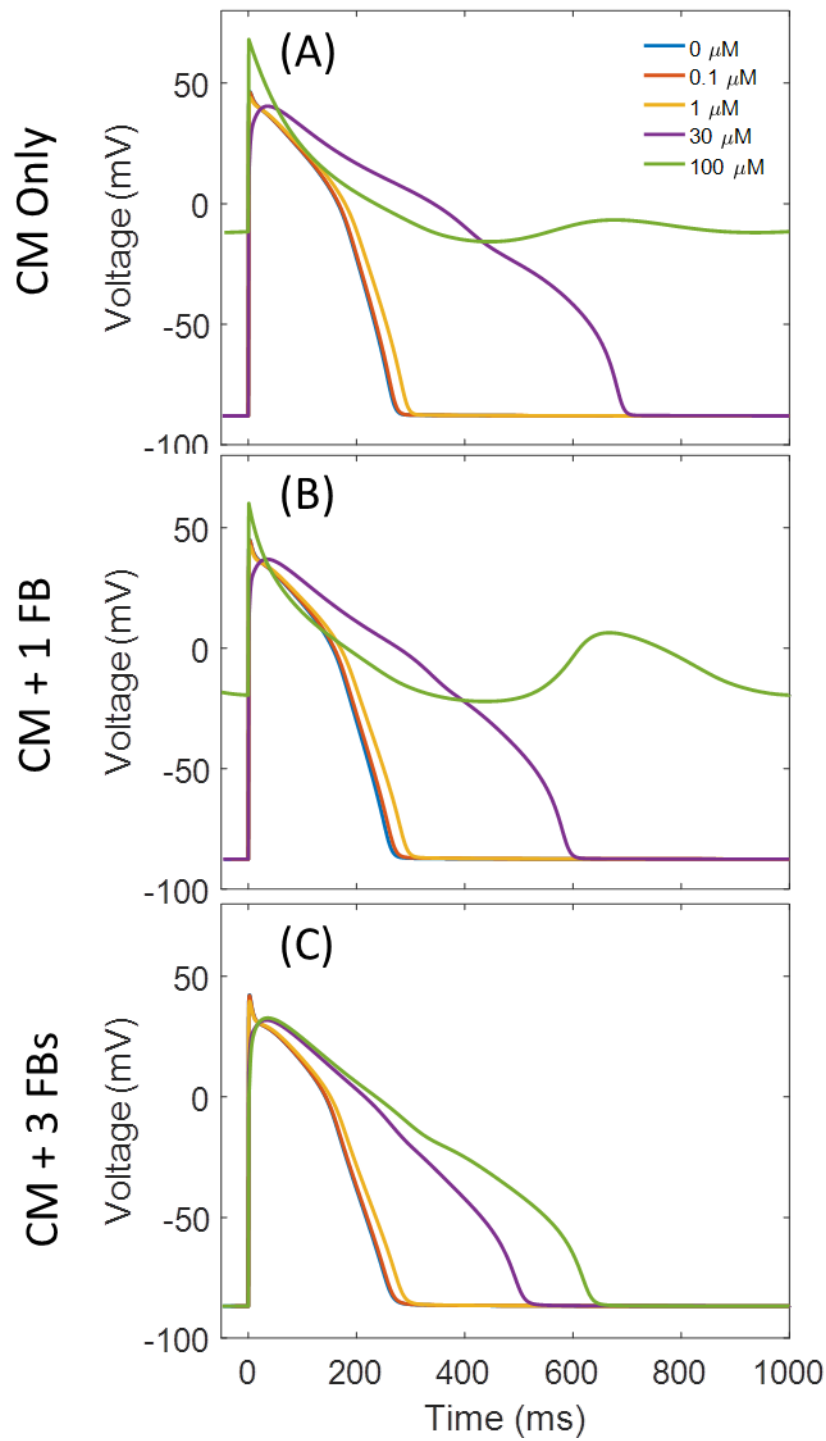

**Figure S2.** Simulation of AP with increasing nebulivolol concentration for cardiomyocyte alone (a), cardiomyocyte coupled with one fibroblast (b) and cardiomyocyte coupled with three fibroblasts (c).
